# Supplementary material for: Myosin 1E coordinates actin assembly and cargo trafficking during clathrin-mediated endocytosis
Source: PubMed Central journal article supplement — Mol Biol Cell. 2012 Aug 1;23(15):2891–904. doi: 10.1091/mbc.E11-04-0383 (PMC3408416; doi:10.1091/mbc.e11-04-0383), 2012-08-01
Supplement: supp_E11-04-0383_070612updatedSupplementalFigures.pdf [file supp_E11-04-0383_070612updatedSupplementalFigures.pdf]

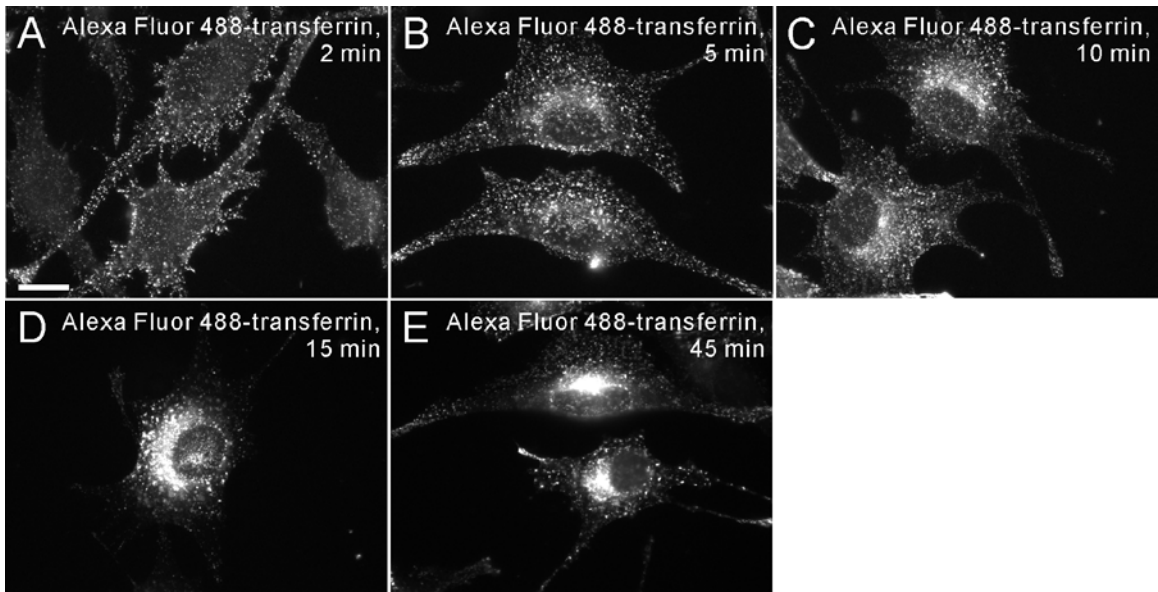

**Figure S1.** Time course of Alexa Fluor 488-transferrin uptake in SK-MEL-28 cells. (A-E) Cells were serum-starved for 1 hour and incubated with 25  $\mu\text{g}/\text{ml}$  Alexa Fluor 488-transferrin for 2, 5, 10, 15, and 45 minutes at 37  $^{\circ}\text{C}$ , respectively. At 2 minutes, the fluorescent transferrin was localized at the cell periphery. By 5, 10 and 15 minutes, the transferrin was trafficked and concentrated at the peri-nuclear region of the cell. After 45 minutes, the fluorescent transferrin accumulated in a dense region near to the nucleus. Bar, 10  $\mu\text{m}$ .

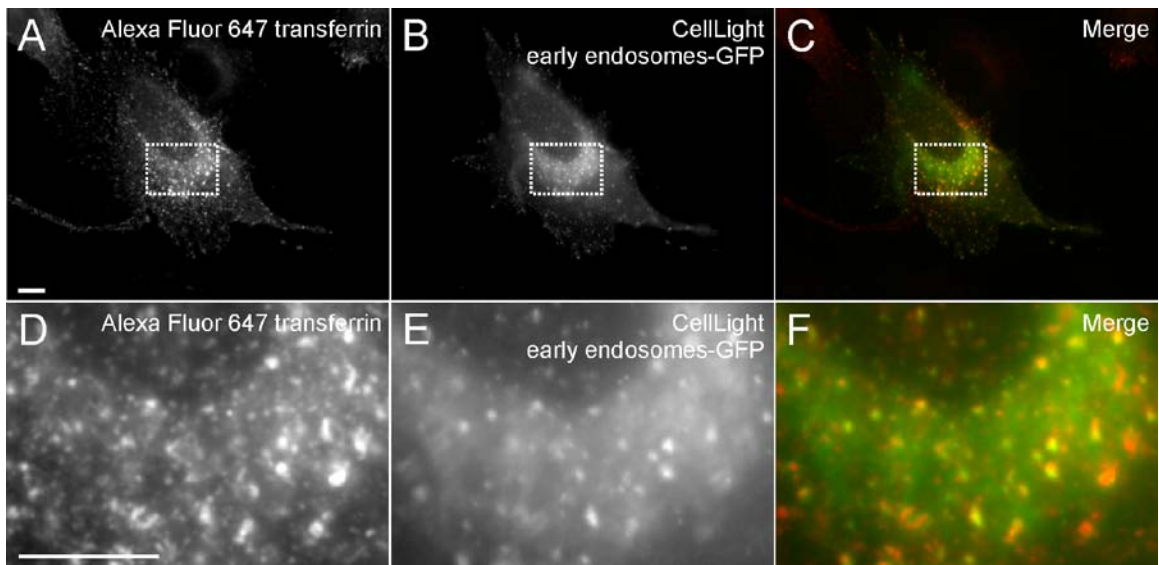

**Figure S2.** The co-localization of internalized Alexa fluor 647-transferrin with an early endosome marker. SK-MEL-28 cells were infected with baculovirus expressing early endosomes-GFP (CellLight Rab5a-GFP) for 24 h and then incubated with Alexa Fluor 647-transferrin for 10 min. (A-C) The internalized transferrin (A) colocalizes with the CellLight early endosome-GFP (B) at the perinuclear region. (C) The merge of (A) and (B). (D-F). A higher magnification of A-C at the perinuclear region. Bars, 10  $\mu$ m.

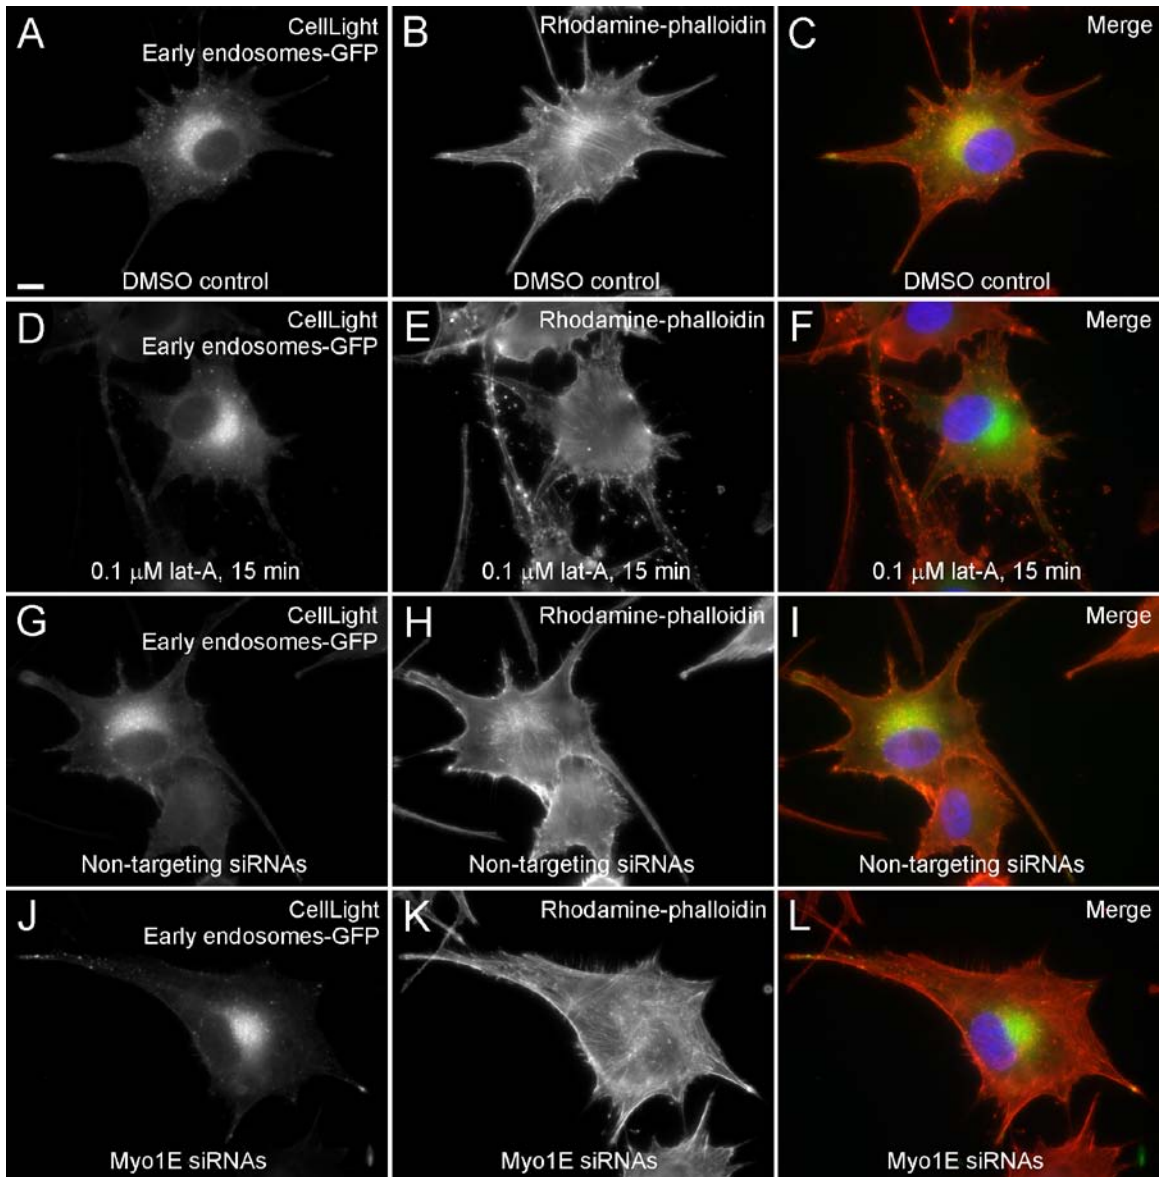

**Figure S3.** Disruption of actin with lat-A or depletion of Myo1E does not affect the distribution of early endosomal marker. SK-MEL-28 cells were treated with 0.01% DMSO (A-C) or 0.1  $\mu$ M lat-A (D-F) showed a perinuclear localization of early endosomal marker, CellLight Rab5a-GFP. Similarly, SK-MEL-28 cells treated with either non-targeting siRNAs (G-I) or Myo1E siRNAs (J-L) does not affect the distribution of Rab5a-GFP. Bar, 10  $\mu$ m.

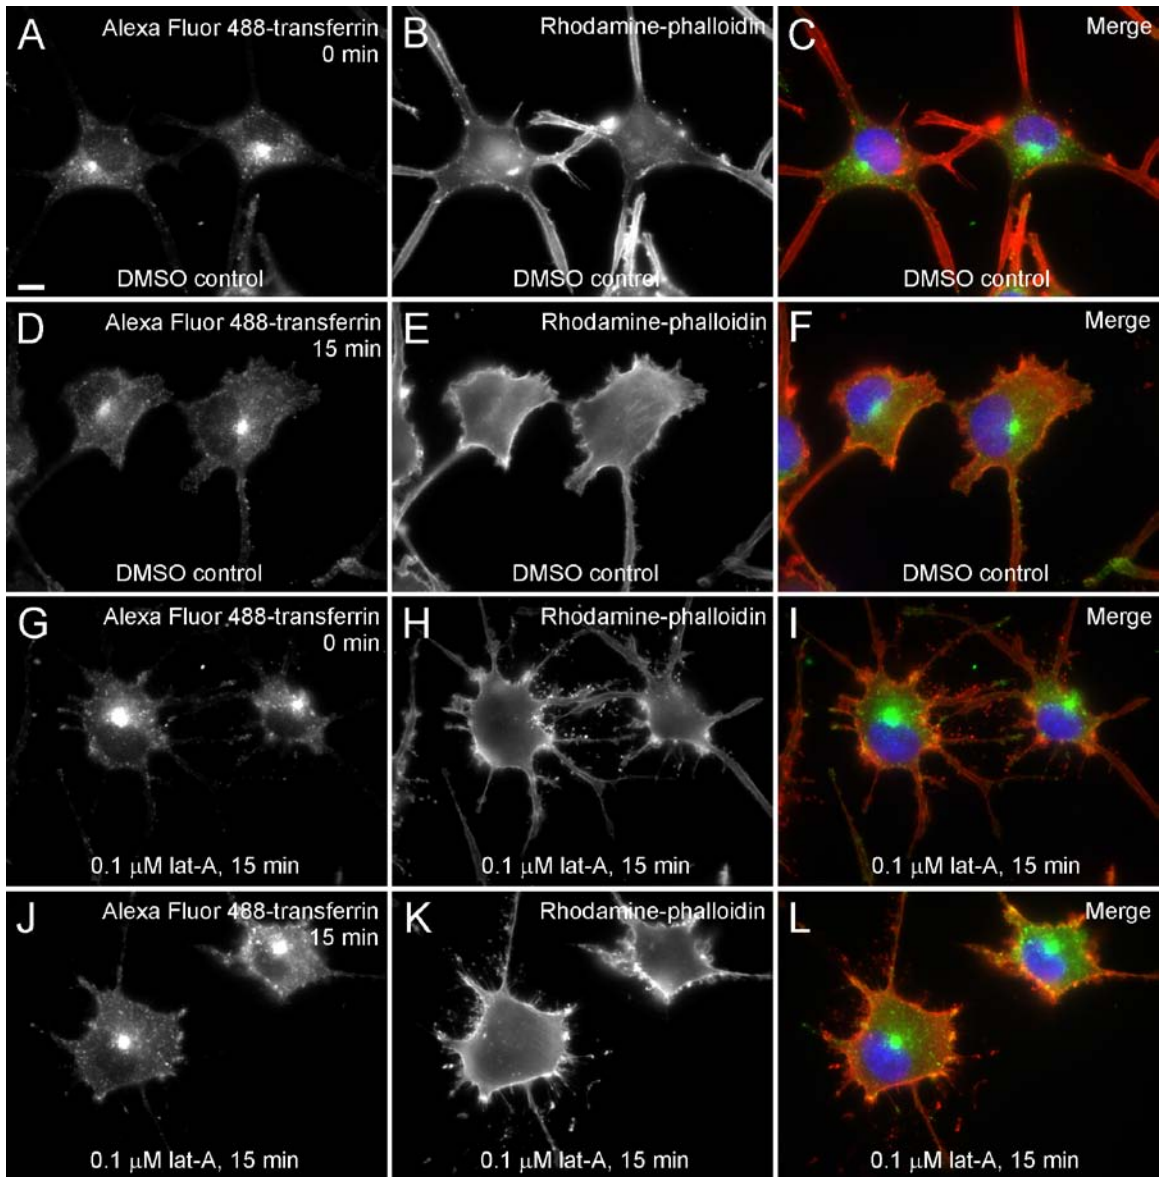

**Figure S4.** Disruption of actin with lat-A does not affect the recycling of internalized transferrin. Serum-starved SK-MEL-28 cells were pre-incubated with Alexa Fluor 488-transferrin at 37°C for 1 h. The cells were cooled on ice and then acid-washed to remove surface-bound Alexa Fluor 488-transferrin. The cells were treated with either 0.01% DMSO (A-F) or 0.1  $\mu$ M lat-A (G-L) for 15 minutes on ice. The treated cells were then washed and fixed with 4% PFA (A-C and G-I) or incubated at 37°C for 15 minutes before fixation (D-F and J-L). The treatment of lat-A (G-L) does not result in apparent changes in the distribution of recycling transferrin compared to the DMSO-treated control. Bar, 10  $\mu$ m.

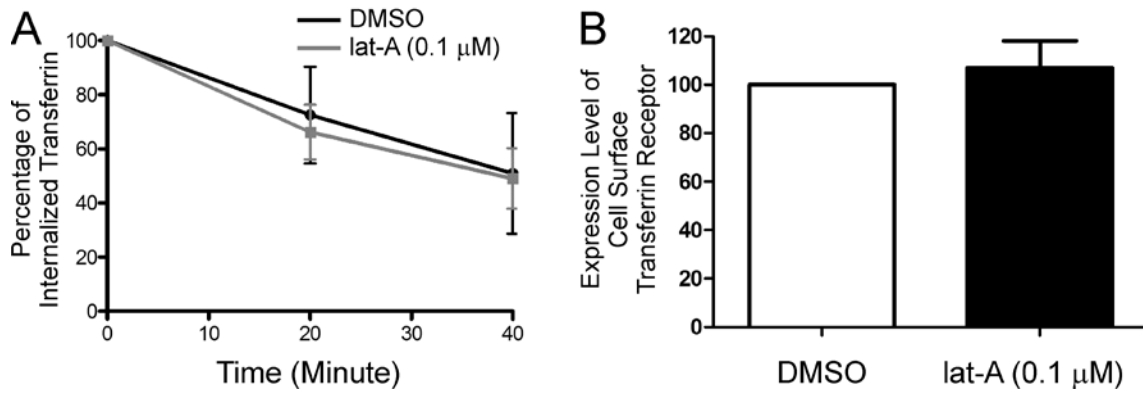

**Figure S5.** (A) Disruption of actin with lat-A does not affect the recycling of internalized Alexa Fluor 647-conjugated transferrin using a quantitative FACS assay. (B) The expression of transferrin receptor at the cell surface does not affected by the lat-A treatment.

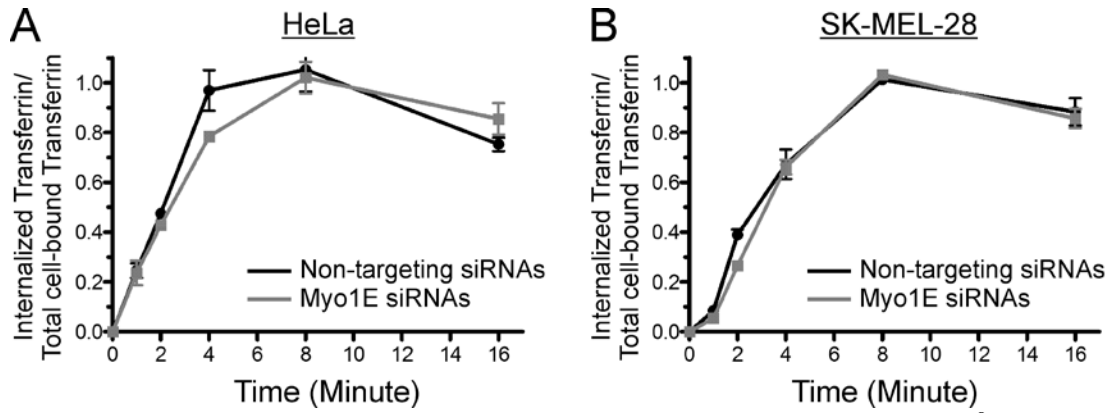

**Figure S6.** ELISA-based transferrin-uptake assay performed at 37°C showed a diminished defect in the internalization of biotinylated transferrin in both (A) HeLa and (B) SK-MEL-28 cells compared to the same assay performed at 31°C (Compared to Fig. 4B).

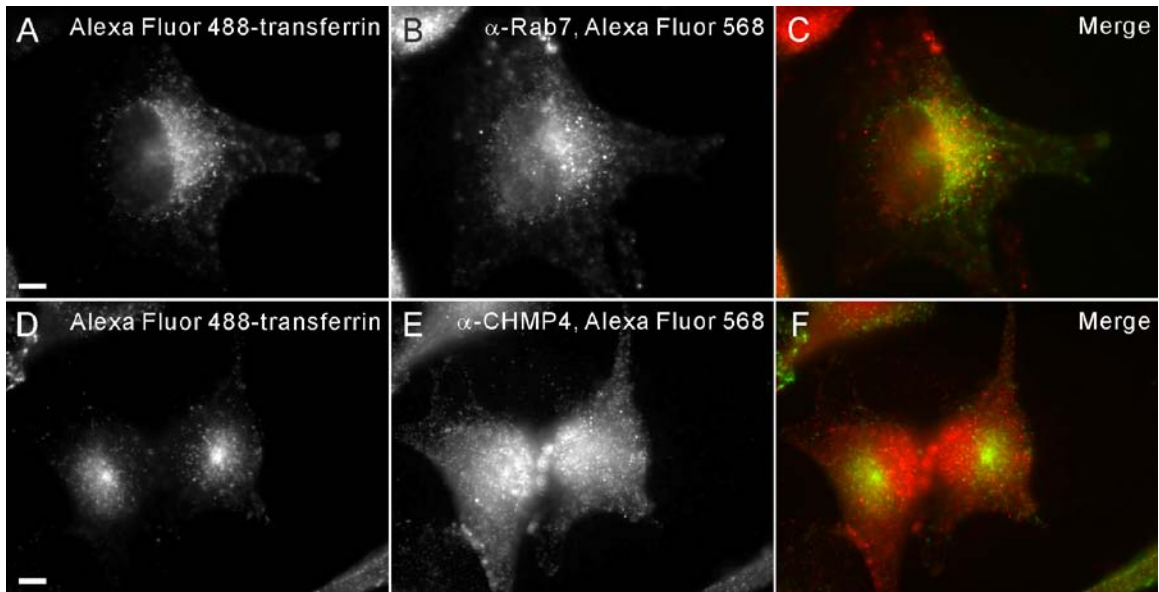

**Figure S7.** Perinuclear internalized transferrin does not co-localize with late endosomal markers. (A-F) Perinuclear internalized Alexa Fluor 488-transferrin-containing puncta (A and D) do not co-localize with late endosomal markers Rab7 (B) and CHMP4 (E) by immunofluorescence. (C) The merge of (A) and (B). (F) The merge of (D) and (E). Bars, 10  $\mu\text{m}$ .

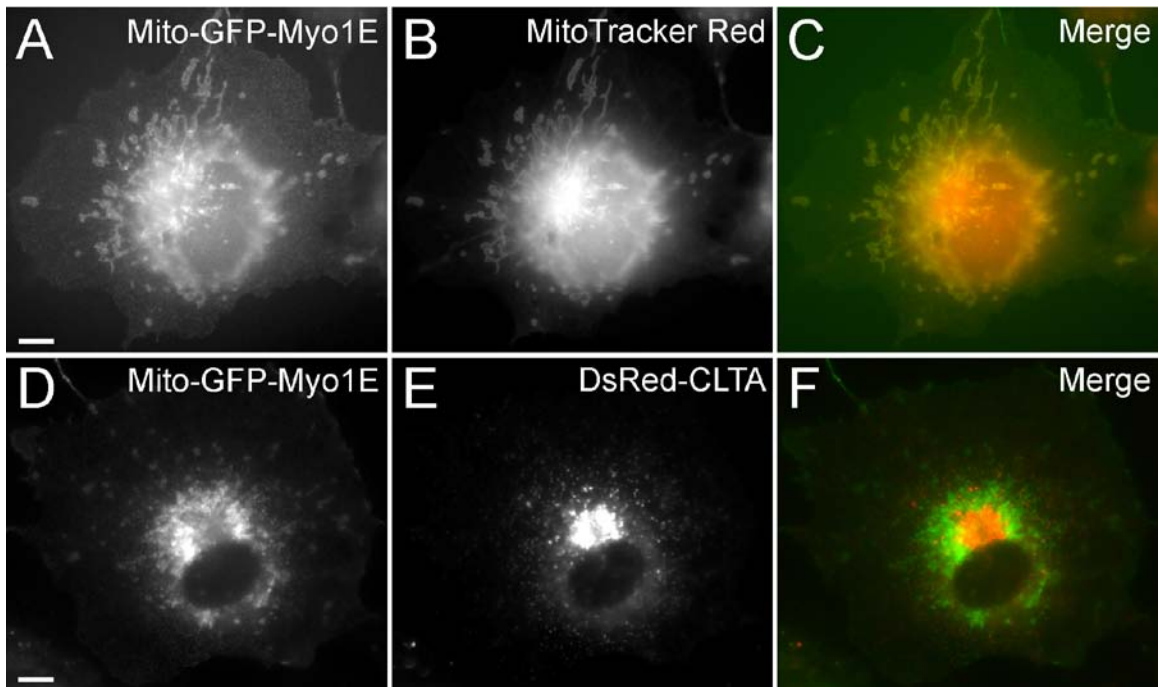

**Figure S8.** Mis-targeting of GFP-Myo1E to mitochondria. (A-C) Transiently transfected Mito-GFP-Myo1E co-localizes with the mitochondria marker MitoTracker Red in Cos-7 cells. (C) The merge of (A) and (B). (D-F) Mito-GFP-Myo1E and DsRed-CLTA do not co-localize in the transfected cell. (F) The merge of (D) and (E). Bars, 10  $\mu\text{m}$ .



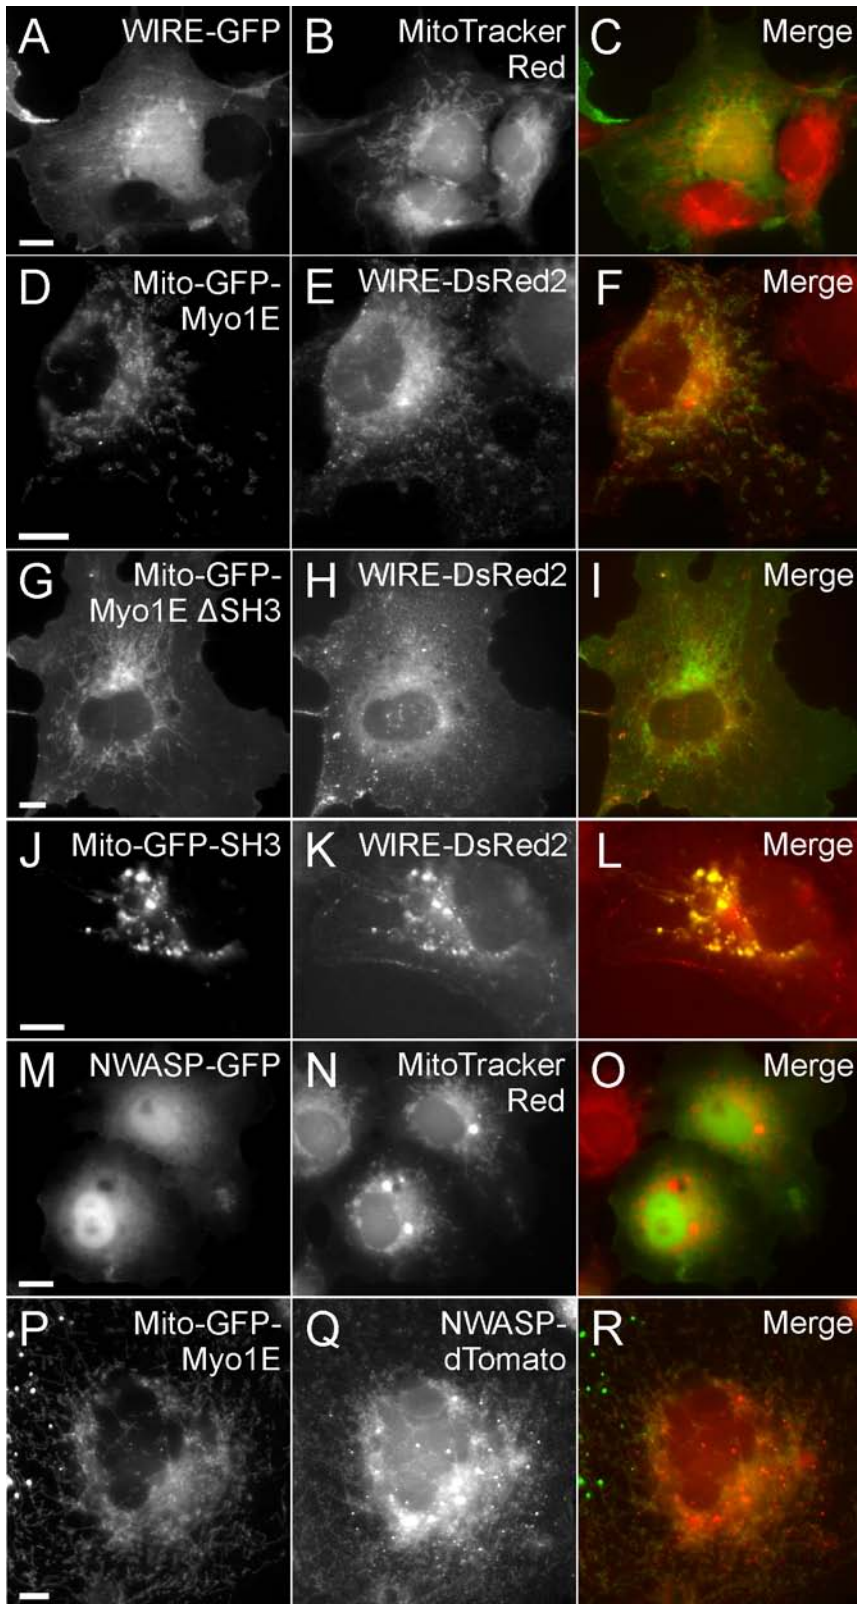

**Figure S9.** Mis-targeting of GFP-Myo1E to mitochondria recruits WIRE-DsRed2 and N-WASP-dtomato. (A-C) Transient expression of WIRE-GFP in control Cos-7 cells labeled with MitoTracker Red. WIRE-GFP does not localize to mitochondria. (C) The

merge of (A) and (B). (D-F) In cells co-transfected with Mito-GFP-Myo1E and WIRE-DsRed2, WIRE-DsRed2 is recruited to the GFP-Myo1E-decorated mitochondria. (F) The merge of (D) and (E). (G-L) Myo1E SH3 domain is necessary and sufficient to recruit WIRE-DsRed2. (G-I) In cells co-transfected with Mito-GFP-Myo1E  $\Delta$ SH3 and WIRE-DsRed2, WIRE-DsRed2 is not recruited to the mitochondria. (I) The merge of (G) and (H). (J-L) In cells co-transfected with Mito-GFP-SH3 and WIRE-DsRed2, the recruitment of WIRE-DsRed2 to the mitochondria is restored. (L) The merge of (J) and (K). (M-O) Transient expression of N-WASP-GFP in control cells labeled with MitoTracker Red. N-WASP-GFP does not localize to mitochondria. (O) The merge of (M) and (N). (P-R) In cells co-transfected with Mito-GFP-Myo1E and N-WASP-dtomato, N-WASP-dtomato is recruited to the GFP-Myo1E-decorated mitochondria. (R) The merge of (P) and (Q). Bars, 10  $\mu$ m.

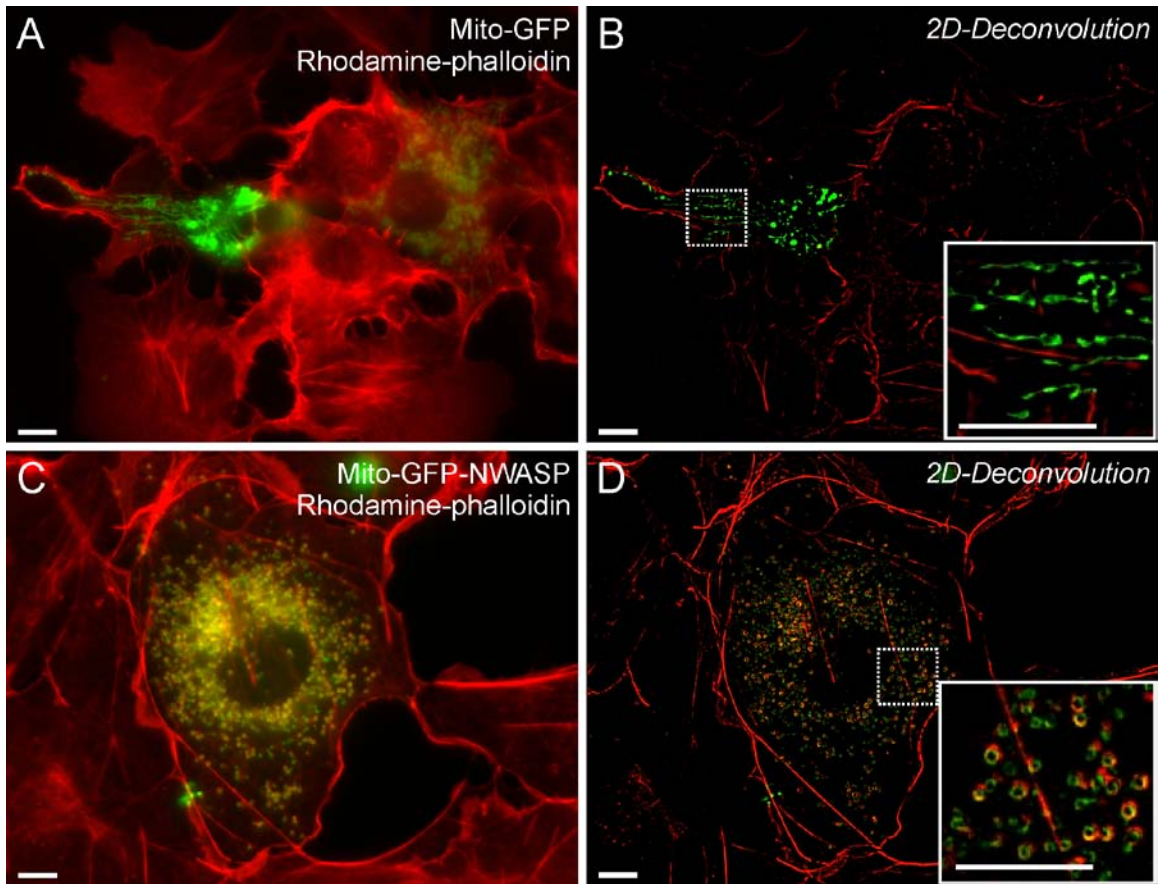

**Figure S10.** Actin assembly at GFP-N-WASP-decorated mitochondria. Cos-7 cells were transfected with either Mito-GFP or Mito-GFP-N-WASP (green) and labeled with rhodamine-phalloidin (red). (A and B) Expression of Mito-GFP does not induce actin assembly at the mitochondria. (B) 2D-deconvolved image of (A). Inset is a magnified view of the indicated region. (C and D) Expression of Mito-GFP-N-WASP induces the formation of actin structures at the mitochondria. (D) 2D-deconvolved image of (C). Bars, 10  $\mu\text{m}$ .

**Movie 1.** Time-lapse movie of Swiss 3T3 DsRed-clathrin cells transiently expressing GFP-Myo1E. Exposure time is 900 ms. Image sequences were captured at 2-sec intervals. Bar, 10  $\mu\text{m}$ .

**Movie 2.** Time-lapse movie of Swiss 3T3 DsRed-clathrin cells transiently expressing GFP-Dynamin 2aa. Exposure time is 900 ms. Image sequences were captured at 2-sec intervals. Bar, 10  $\mu\text{m}$ .

**Movie 3.** Time-lapse movie of Swiss 3T3 DsRed-clathrin cells transiently expressing GFP-N-WASP. Exposure time is 900 ms. Image sequences were captured at 2-sec intervals. Bar, 10  $\mu\text{m}$ .

**Movie 4.** Time-lapse movie of Swiss 3T3 DsRed-clathrin cells transiently expressing GFP-labeled F-actin binding domain of utrophin. Exposure time is 900 ms. Image sequences were captured at 2-sec intervals. Bar, 10  $\mu\text{m}$ .

**Movie 5.** Time-lapse movie of Swiss 3T3 cells transiently expressing Myo1E-GFP and Dynamin 2aa-mCherry. Exposure time is 900 ms. Image sequences were captured at 1-sec intervals. Bar, 10  $\mu\text{m}$ .

**Movie 6.** Time-lapse movie of Swiss 3T3 cells transiently expressing Myo1E-GFP and WIP-dtomato. Exposure time is 900 ms. Image sequences were captured at 1-sec intervals. Bar, 10  $\mu\text{m}$ .

**Movie 7.** Time-lapse movie of Swiss 3T3 cells transiently expressing Myo1E-GFP and WIRE-DsRed2. Exposure time is 900 ms. Image sequences were captured at 1-sec intervals. Bar, 10  $\mu\text{m}$ .

**Movie 8.** 3-D kymograph for SK-MEL-2 CLTA<sup>EN</sup>/DNM2<sup>EN</sup> cells treated with non-targeting siRNA. Exposure time is 500 ms. Image sequences were captured at 2-sec intervals.

**Movie 9.** 3-D kymograph for SK-MEL-2 CLTA<sup>EN</sup>/DNM2<sup>EN</sup> cells treated with Myo1E siRNA. Exposure time is 500 ms. Image sequences were captured at 2-sec intervals.
